# Supplementary material
Source: publisher figshare collection journal article supplement (https://gsajournals.figshare.com/articles/dataset/_/11320484)
Supplement: Supplementary file 1 [file 1]

**Figure S1**

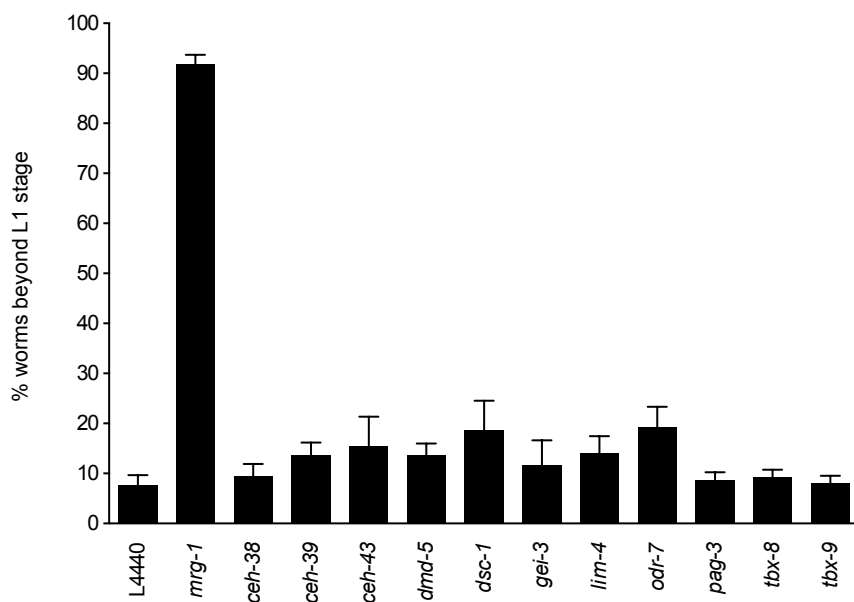

**Figure S1: Eleven Transcription Factors show low levels of HTA phenotype suppression.**

Knock-down of 11 of 26 transcription factor candidates tested showed suppression of the HTA phenotype in *lin-54* mutants but did not show a significant difference from L4440 empty vector RNAi. Error bars indicate standard error of proportion.
