# Supplementary material
Source: publisher figshare collection journal article supplement (https://gsajournals.figshare.com/articles/dataset/_/11320484)
Supplement: Supplementary file 2 [file 1]

**Figure S3**

**A**

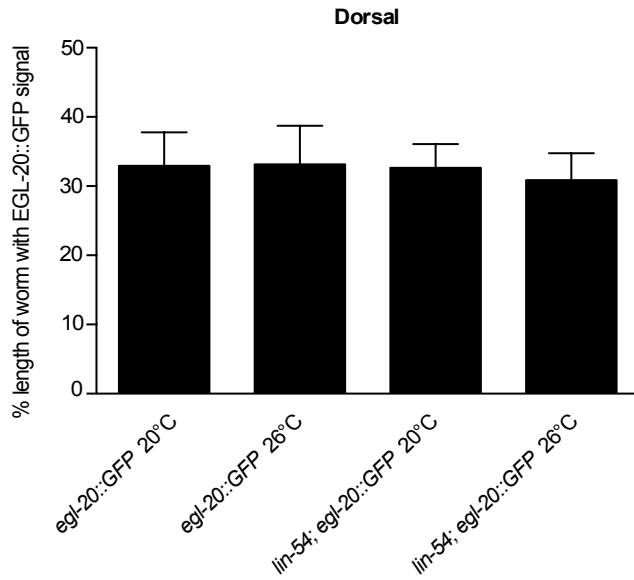

**B**

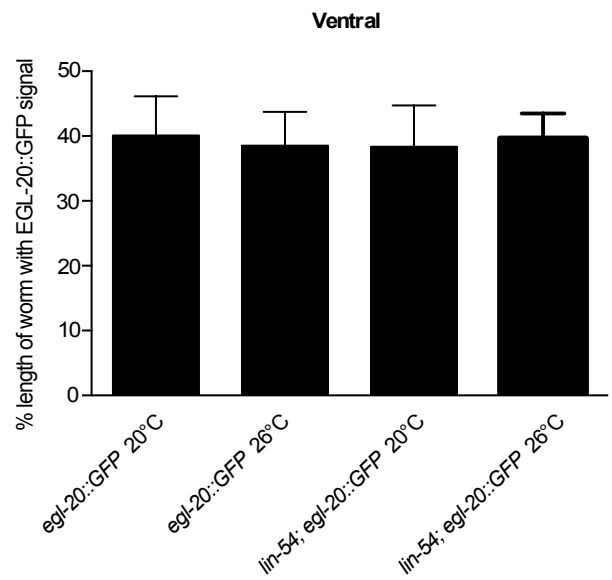

**Figure S3: Wnt ligand EGL-20 localization is not altered in *lin-54* mutants.** The Wnt EGL-20 gradient was measured by determining the linear distance of GFP on both dorsal (left panel) and ventral side (right panel) from the posterior end of the worm divided by total length of the worm. No significant difference was seen between wild type and *lin-54* mutants at either 20°C or 26°C.
