# Supplementary material
Source: publisher figshare collection journal article supplement (https://gsajournals.figshare.com/articles/dataset/_/11320484)
Supplement: Supplementary file 3 [file 1]

**Figure S2**

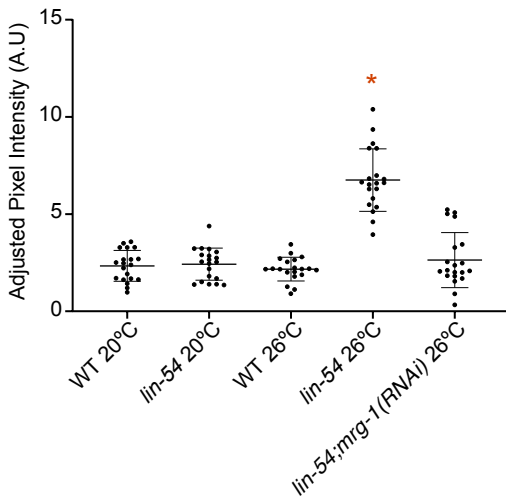

**Figure S2: Frequency distribution of somatic adjusted PGL-1 intensity of control samples.**

Wild type and *lin-54* mutants were grown on L4440 empty vector RNAi bacteria unless otherwise indicated. Y-axis indicates adjusted PGL-1 intensity. The dot plot shows the adjusted PGL-1 intensity distribution for a population of L1s under a particular RNAi treatment. The horizontal lines indicate the mean and SD of the distribution. Wild type at 20°C, wild type at 26°C and *lin-54* mutants at 20°C do not show a significant difference in ectopic PGL-1 expression from each other but all the three showed a significant difference in ectopic PGL-1 expression from *lin-54* mutants at 26°C. Kolmogorov-Smirnov test was used for testing significance (\*P value < 0.05).
